# Supplementary material for: A new layered sodium molybdenum oxide anode for full intercalation-type sodium-ion batteries
Source: Royal Society of Chemistry journal article supplement (doi:10.1039/c5ta05444c), 2015-01-01
Supplement: c5ta05444c1.pdf [file c5ta05444c1.pdf]

## Supporting Information

### A New Layered Sodium Molybdenum Oxide Anode for Full Intercalation-Type Sodium-Ion Batteries

Kai Zhu,<sup>ab</sup> Shaohua Guo,<sup>a\*</sup> Jin Yi,<sup>a</sup> Songyan Bai,<sup>a</sup> Yingjin Wei,<sup>b\*</sup> Gang Chen<sup>b</sup> and Haoshen Zhou<sup>a,c\*</sup>

<sup>a</sup> Energy Technology Research Institute, Institution National Institute of Advanced Industrial Science and Technology (AIST), Umezono

1-1-1, Tsukuba, Japan

<sup>b</sup> Key Laboratory of Physics and Technology for Advanced Batteries (Ministry of Education), College of Physics, Jilin University,

Qianjin Street 2699, Changchun, China

<sup>c</sup> National Laboratory of Solid State Microstructures & Department of Energy Science, Nanjing University, Nanjing 210093, China

\*Corresponding authors: [guo.shaohua@outlook.com](mailto:guo.shaohua@outlook.com); [yjwei@jlu.edu.cn](mailto:yjwei@jlu.edu.cn); [hs.zhou@aist.go.jp](mailto:hs.zhou@aist.go.jp)

## Experimental

### Synthesis

Layered  $\text{Na}_{0.3}\text{MoO}_2$  sample was synthesized by a one-step solid-state reaction. A proportionable mixture of reagent grade  $\text{Na}_2\text{CO}_3$  (20% excess) and  $\text{MoO}_2$  was ball-milled under wet condition with alcohol additions for 20 h at 200 rpm. After drying at 80 °C for 12 h, the obtained powder was pressed into pellets. Finally, the pellets were heated at 750 °C for 15 h under an Ar atmosphere. The obtained material was stored in an argon-filled glove box.

Layered  $\text{Na}_{0.8}\text{Ni}_{0.4}\text{Ti}_{0.6}\text{O}_2$  is prepared as our previous report. The precursors of  $\text{Na}_2\text{CO}_3$ , NiO and  $\text{TiO}_2$  were also ball-milled under wet condition with alcohol additions for 20 h at 200 rpm. After drying 80 °C for 12 h, the mixture was pressed into pellets and heated at 900 °C for 20 h under an Ar flow. The as-prepared materials was also stored in an argon-filled glove box.

### Characterization

The crystalline structure and *ex-situ* XRD was characterized by Bruker D8 Advance Diffractometer using Cu K $\alpha$  radiation. The morphology of as-prepared materials was observed using scanning electron microscopy (SEM, TOPCON DS-720 instrument). Transmission electron microscope (TEM) and high-resolution transmission electron microscope (HRTEM) were performed on a FEI Tacnai G2 electron microscope equipped with an X-ray energy dispersive spectroscopy (EDS, BRUKER AXS).

### Electrochemical test

The electrochemical experiments were performed using 2032-type coin cells, with sodium metal served as the counter electrode, which were assembled in an argon-filled glove box. The working electrode was prepared by mixing 70 wt% of active material, 20 wt% of carbon black conductive additive and 10 wt% of polyvinylidene fluoride (PVDF) binder onto aluminium foil. Mass loading of the electrode is about 2.5~3 mg/cm<sup>2</sup>. The working and counter electrodes were separated by glass fiber membrane. The electrolyte was 1 M NaPF<sub>6</sub> in ethylene carbonate–diethyl carbonate (EC/DEC, 1 : 1 (v/v)). Galvanostatic charge – discharge was performed on a Hokuto Denko HJ1001SD8 battery tester in the voltage window of 0.05 – 2.0 V. Cyclic voltammetry (CV) was performed on Solartron 1640. For the full cell, the pre-desodiation of  $\text{Na}_{0.8}\text{Ni}_{0.4}\text{Ti}_{0.6}\text{O}_2$  and pre-sodiation of  $\text{Na}_{0.3}\text{MoO}_2$  were performed to carry out the three cycles' activation.  $\text{Na}_{0.8}\text{Ni}_{0.4}\text{Ti}_{0.6}\text{O}_2$  /Na half cells were cycled in

the voltage range of 1.5-4 V at current density of 20 mA/g to get the pre-desodiation of  $\text{Na}_{0.8}\text{Ni}_{0.4}\text{Ti}_{0.6}\text{O}_2$ . And  $\text{Na}_{0.3}\text{MoO}_2/\text{Na}$  half cells were cycled in the voltage range of 0.05-2 V at current density of 20 mA/g to get pre-sodiation of  $\text{Na}_{0.3}\text{MoO}_2$ . The electrode mass ration of cathode and anode is around 1.2. The full cell is cathode limited and cycled in the voltage of 0.6-3.6 V.

**Table S1** The sodium storage properties for reported titanium-based materials.

|                                                                        | Current density | Voltage range   | Capacity         | Cycle number | Capacity retention |
|------------------------------------------------------------------------|-----------------|-----------------|------------------|--------------|--------------------|
| $\text{Na}_2\text{Ti}_6\text{O}_{13}$ <sup>1</sup>                     | 5 mA/g          | 0-2.5 V         | 200 mAh/g        | 30           | 40%                |
| $\text{Na}_2\text{Ti}_3\text{O}_7$ <sup>2</sup>                        | 17.7 mA/g       | 0.01-2.5 V      | 135 mAh/g        | 25           | 50%                |
| $\text{Na}_4\text{Ti}_5\text{O}_{12}$ <sup>3</sup>                     | 12.5 mA/g       | 0.1-2.5 V       | 70 mAh/g         | 50           | 80%                |
| $\text{Na}_{2/3}\text{Co}_{1/3}\text{Ti}_{2/3}\text{O}_2$ <sup>4</sup> | 20 mA/g         | 0.15-2.5 V      | 90 mAh/g         | -            | -                  |
| $\text{Na}_{2/3}\text{Ni}_{1/3}\text{Ti}_{2/3}\text{O}_2$ <sup>5</sup> | 22.5 mA/g       | 0.2-2 V         | 75 mAh/g         | 22           | 60%                |
| <b><math>\text{Na}_{0.3}\text{MoO}_2</math><br/>(this work)</b>        | <b>20 mA/g</b>  | <b>0.05-2 V</b> | <b>140 mAh/g</b> | 50           | <b>85%</b>         |

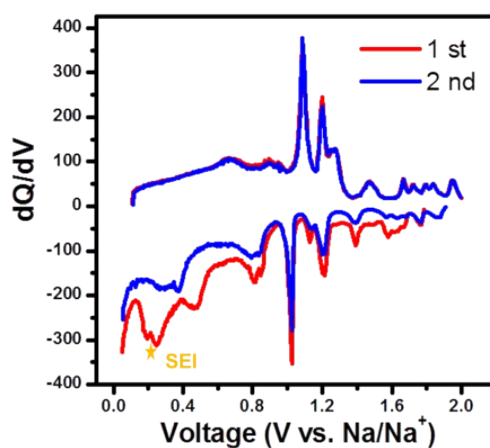

**Figure S1** The  $dQ/dV$  curves of the  $\text{Na}_{0.3}\text{MoO}_2$  at current density of 20 mA/g.

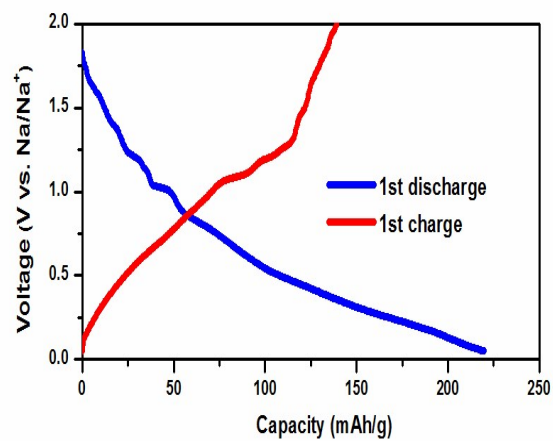

**Figure S2** Discharge-charge curves of the  $\text{Na}_{0.3}\text{MoO}_2$  for the first cycle at current density of 20 mA/g.

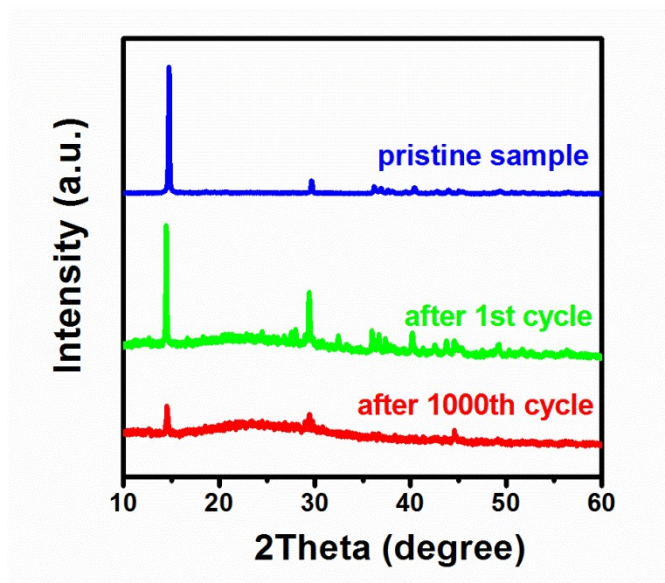

**Figure S3** Standard XRD pattern of  $\text{Na}_{0.3}\text{MoO}_2$  and *ex-situ* XRD patterns of  $\text{Na}_{0.3}\text{MoO}_2$  after first and 1000th cycles.

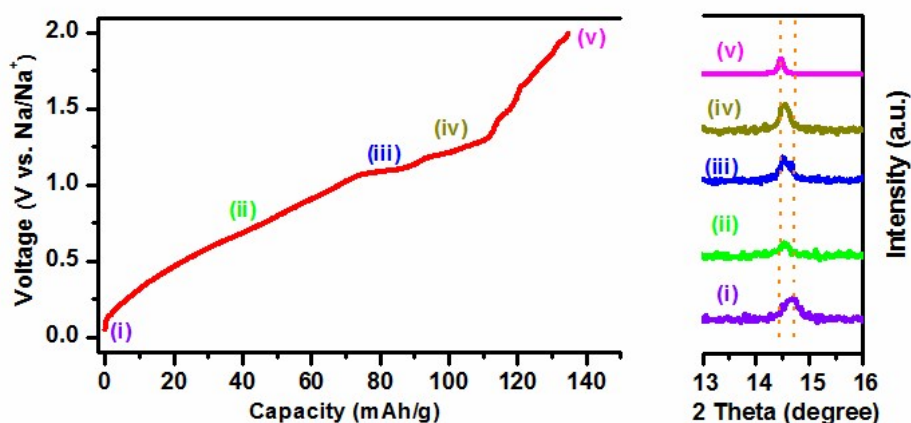

Figure S4 *Ex-situ* XRD patterns at different charge depths of the first cycle

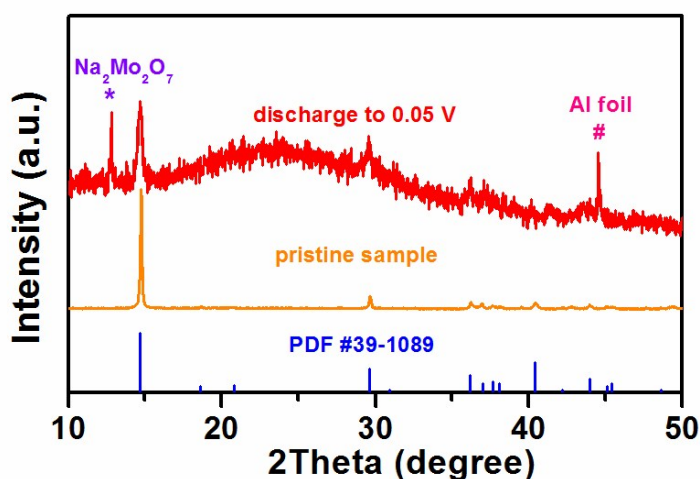

Figure S5 *Ex-situ* XRD pattern of  $\text{Na}_{0.3}\text{MoO}_2$  after first discharge process.

$\text{Na}_{0.3}\text{MoO}_2$  as anode is a typical intercalation-type material based on following reasons:

1, From  $dQ/dV$  curves (as shown in **Figure S1**), it is clear that the position of the peaks do not change between the 1<sup>st</sup> and 2<sup>nd</sup> cycles, while for the alloying or conversion reaction, there are obvious change of the peaks position and peak intensity.<sup>6-9</sup> It would be characterized by the typical intercalation reaction.<sup>10-12</sup>

2, The reversible capacity is about 146 mAh/g, corresponding to 0.7 reversible sodium ion (de)intercalation in per  $\text{Na}_{0.3}\text{MoO}_2$ . The amount of sodium ions suggests that the sodium ion insertion into the  $\text{Na}_{0.3}\text{MoO}_2$  to form  $\text{NaMoO}_2$  as the following equation:

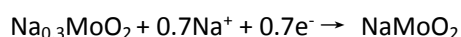

For the alloying or conversion reaction, more sodium ions will react with the electrode materials.<sup>9-12</sup>

3, The *ex-situ* XRD patterns at different charge depths of the first cycle (as shown in the right of **Figure S4**) display a shift of peak position during the sodium ion insertion into the anode materials. It is a typical phenomenon for the intercalation-type anode.<sup>13, 14</sup> Due to the low valence state of Mo is sensitive to the  $\text{O}_2$ , some impurity such as  $\text{Na}_2\text{Mo}_2\text{O}_7$  are formed during the XRD testing in the air environment.

4, From the *ex-situ* XRD patterns after the 1<sup>st</sup> discharge as shown in **Figure S5**, it shows that peaks of  $\text{Na}_{0.3+x}\text{MoO}_2$  are obvious and no peaks belonging to Mo metal or NaMo alloys are detected. It suggests that the  $\text{Na}_{0.3}\text{MoO}_2$  is a typical intercalation-type anode.<sup>15, 16</sup>

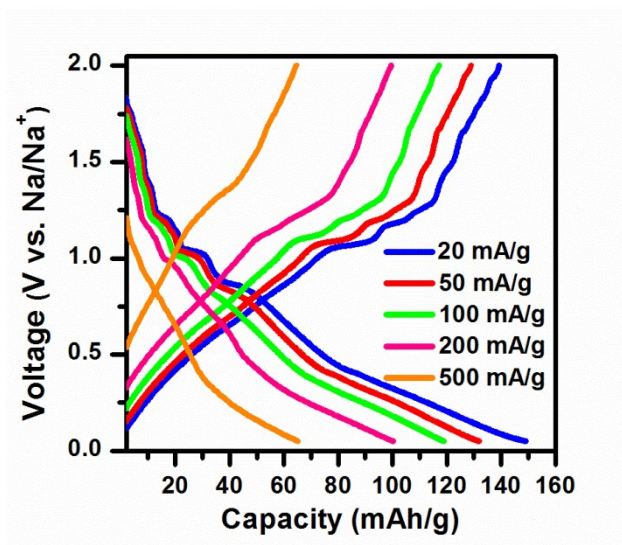

**Figure S6** Discharge-charge profiles of the sample at different current densities.

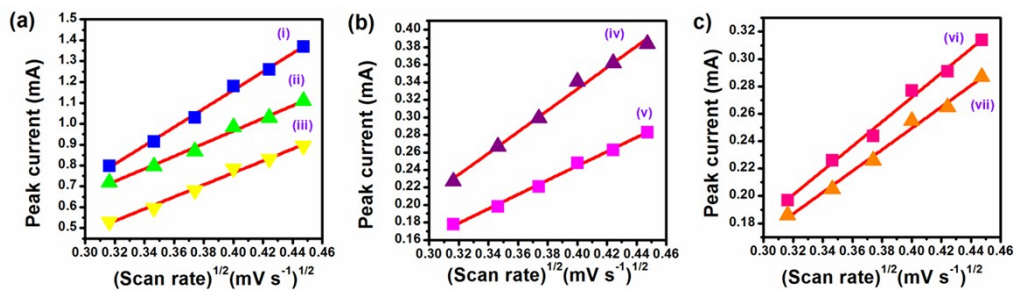

**Figure S7** Linear fitting of  $I_p$  vs.  $v^{1/2}$  relationship of the sample.

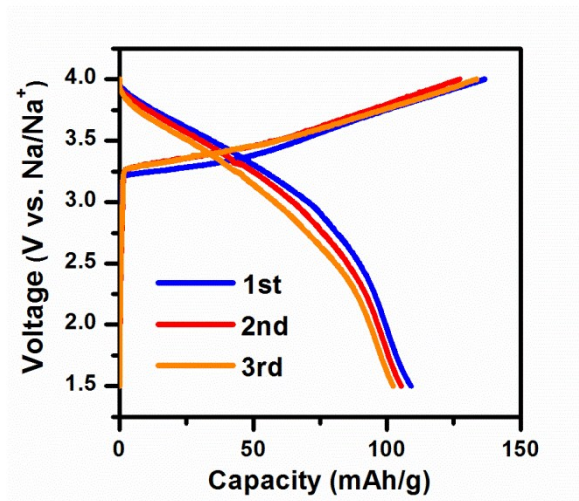

**Figure S8** Charge-discharge profiles of  $\text{Na}_{0.8}\text{Ni}_{0.4}\text{Ti}_{0.6}\text{O}_2$  for the first three cycles.

The excellent full cell performance should be attributed to the high efficiency of both cathode and anode. For the cathode side, the charge-discharge profiles of  $\text{Na}_{0.8}\text{Ni}_{0.4}\text{Ti}_{0.6}\text{O}_2$  for the first three cycles displayed a low efficiency (about 80 %), which is caused by the decomposition of electrolyte at high charge cut-off voltage. In the full cell, the cut-off voltage is 3.6 V, which could much reduce the inefficiency of the cathode.<sup>17</sup> Thus, the full cell could present an excellent cycling performance.

#### Reference:

1. K. Shen and M. Wagemaker, *Inorganic Chemistry*, 2014, **53**, 8250-8256.
2. J. Xu, C. Ma, M. Balasubramanian and Y. S. Meng, *Chemical Communications*, 2014, **50**, 12564-12567.
3. P. J. Naeyaert, M. Avdeev, N. Sharma, H. B. Yahia and C. D. Ling, *Chemistry of Materials*, 2014, **26**, 7067-7072.
4. H. Yu, Y. Ren, D. Xiao, S. Guo, Y. Zhu, Y. Qian, L. Gu and H. Zhou, *Angewandte Chemie*, 2014, **126**, 9109-9115.
5. R. Shanmugam and W. Lai, *ECS Electrochemistry Letters*, 2014, **3**, A23-A25.
6. B. Qu, C. Ma, G. Ji, C. Xu, J. Xu, Y. S. Meng, T. Wang and J. Y. Lee, *Advanced Materials*, 2014, **26**, 3854-3859.
7. S. Yuan, X. I. Huang, D. I. Ma, H. g. Wang, F. z. Meng and X. b. Zhang, *Advanced Materials*, 2014, **26**, 2273-2279.
8. L. David, R. Bhandavat and G. Singh, *ACS Nano*, 2014, **8**, 1759-1770.
9. W. Li, S. L. Chou, J. Z. Wang, J. H. Kim, H. K. Liu and S. X. Dou, *Advanced Materials*, 2014, **26**, 4037-4042.
10. Y. Dong, S. Li, K. Zhao, C. Han, W. Chen, B. Wang, L. Wang, B. Xu, Q. Wei and L. Zhang, *Energy & Environmental Science*, 2015, **8**, 1267-1275.
11. J. Billaud, G. Singh, A. R. Armstrong, E. Gonzalo, V. Roddatis, M. Armand, T. Rojo and P. G. Bruce, *Energy & Environmental Science*, 2014, **7**, 1387-1391.
12. Y. Zhang, L. Guo and S. Yang, *Chemical Communications*, 2014, **50**, 14029-14032.
13. Y. Wang, J. Liu, B. Lee, R. Qiao, Z. Yang, S. Xu, X. Yu, L. Gu, Y.-S. Hu and W. Yang, *Nature Communications*, 2015, **6**.
14. Y. Wang, R. Xiao, Y.-S. Hu, M. Avdeev and L. Chen, *Nature Communications*, 2015, **6**.
15. D. Wu, X. Li, B. Xu, N. Twu, L. Liu and G. Ceder, *Energy & Environmental Science*, 2015, **8**, 195-202.
16. J. Wang, B. Qiu, X. He, T. Risthaus, H. Liu, M. C. Stan, S. Schulze, Y. Xia, Z. Liu and M. Winter, *Chemistry of*

*Materials*, 2015.

17 S. Guo, H. Yu, P. Liu, Y. Ren, T. Zhang, M. Chen, M. Ishida and H. Zhou, *Energy & Environmental Science*, 2015, **8**, 1237-1244.
